# Supplementary material for: SiN-based optoelectronic synaptic devices: enhancing future cognitive computing systems
Source: Royal Society of Chemistry journal article supplement (doi:10.1039/d4tc02992e), 2024-01-01
Supplement: d4tc02992e1.pdf [file d4tc02992e1.pdf]

## Supporting Information

### SiN-based optoelectronic synaptic devices: enhancing future cognitive computing systems

Hyogeun Park, Sungjun Kim

Division of Electronics and Electrical Engineering, Dongguk University, Seoul 04620, South Korea.

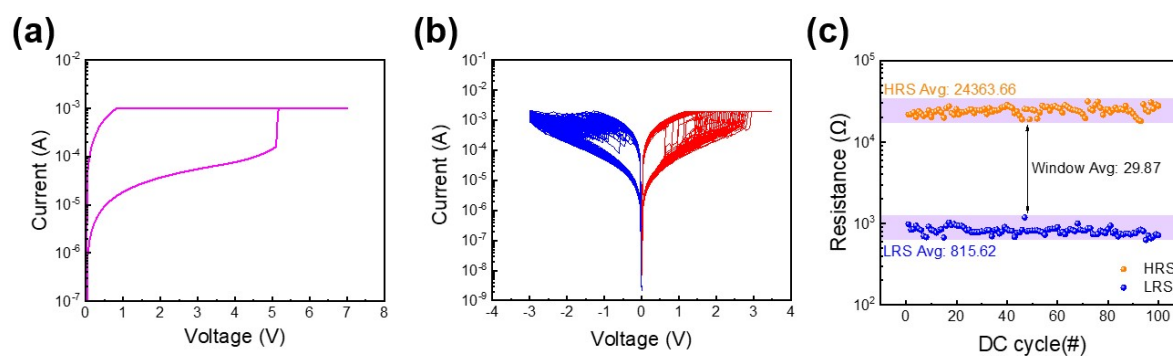

**Figure S1.** (a) Forming process, (b) I-V characteristics and (c) Endurance of ITO/SiN/TaN device
